# Supplementary material for: A Cystine-Cysteine Intercellular Shuttle Prevents Ferroptosis in xCTKO Pancreatic Ductal Adenocarcinoma Cells
Source: PubMed Central journal article supplement (PMC8004104; doi:10.3390/cancers13061434), 2021-03-21
Supplement: cancers-13-01434-s001.pdf [file cancers-13-01434-s001.pdf]

## SUPPLEMENTARY FIGURE LEGENDS:

**Figure S1. Redox nature of the “saving agent”** **A.** Micrographs of MiaPaCa-2 xCT<sup>KO</sup> cells in control conditions co-culture with LS174T wt in DMEM or DMEM supplemented with glucose oxidase (0,2mU/ml GOx), **B.** ROS level in MiaPaCa-2 wt and two independent xCT<sup>KO</sup> clones in control conditions, after addition of NAC or in the co-culture (CC) with LS174T/A549 wt cells for 24h. The cells were seeded in 6-well dishes and in the day of analysis, trypsinized and incubated with 2 $\mu$ M DCFDA (Abcam) for 30 minutes at 37°C/5% CO<sub>2</sub> protected from the light. Following, FACS analysis of total ROS level were performed and the data are represented in modal scaling (each peak is normalized to its mode, i.e., to % of maximal number of cells found in a particular bin). Representative histograms are shown, and the bar graph represent mean  $\pm$  SEM; n=3; \*, P<0.05, comparison with WT control of each group.

**Figure S2. Cell-to-cell interplay is fueled by the xCT activity of the host cells.** **A.** The effects of buthionine sulphoximine (BSO) and erastin on the lipid peroxide accumulation in the A549 wt, measured by BODIPY 591/581 C11 staining. **B.** The effects of media containing or not cyst(e)ine on the BODIPY 591/581 C11 staining in the A549 wt alone or in the co-culture with MiaPaCa-2 xCT<sup>KO</sup> cells. Representative histograms of three independent experiments are shown.

**Figure S3. xCTKO and GCLcKO cells as hosts.** Proliferation rate of the Capan-2 wt, xCT<sup>KO</sup> and GCLc<sup>KO</sup> cells does not correlate with their ability to prevent ferroptosis in MiaPaCa-2 xCT<sup>KO</sup> counterpart. **A.** Proliferation rates of the Capan-2 wt, xCT<sup>KO</sup> and GCLc<sup>KO</sup> cells are presented as fold of change (mean  $\pm$  SEM; n = 2). **B.** Proliferation rate (48h), **C.** lipid hydroperoxide accumulation (24h) and **D.** visualization (48h) of MiaPaCa-2 wt and two independent xCT<sup>KO</sup> clones cultivated in the presence or not of NAC, Capan-2 wt, xCT<sup>KO</sup> and GCLc<sup>KO</sup> (Boyden chamber, mean  $\pm$  SEM; n = 2). The host cells were pre-seeded in the upper well of the Boyden chamber (Falcon® Permeable Support for 24-well Plate with 8.0  $\mu$ m Transparent PET Membrane), and 24h later, guest cells (MiaPaCa-2 wt or xCTKO) were added in the lower well (the same 6%/94% ratio has been maintained for the experiment as in the case of the co-culture). After 24/48h upper well had been removed and the guest cells from the lower well were analyzed for lipid hydroperoxide accumulation (FACS analysis, 24h), proliferation (48h), or cell survival (Giemsa staining, 48h).

**Figure S4: Potential cysteine transporters.** **A.** ASCT2 expression was analysed in the clones obtained after transfection of ASCT2 CRISPR-Cas9 plasmide in the MiaPaCa-2 xCT<sup>KO</sup> cells and two independent xCT-ASCT2<sup>DKO</sup> are chosen for further experiments (cl.1 and cl.2). **B.** The expression levels of ASCT1, ASCT2 and LAT1 in A549: wt, ASCT1<sup>KO</sup>, ASCT2<sup>KO</sup>, ASCT1-ASCT2<sup>DKO</sup>, LAT1<sup>KO</sup> after 24h culturing in the DMEM, ARD1 were used as loading control. Representative blots are shown. **C.** Clonal growth

of A549: wt, ASCT1<sup>KO</sup>, ASCT2<sup>KO</sup>, ASCT1-ASCT2<sup>DKO</sup> and LAT1<sup>KO</sup>. Cells (10<sup>3</sup>) were cultivated for 15 days in regular DMEM media or DMEM media supplemented with 200 $\mu$ M CySSCy, 400 $\mu$ M CySH or 10mM MeAIB (inhibitor of SNAT transporters family) and colored for visualizations with Giemsa. Representative images are shown. #NB, First row represents regular DMEM supplemented with 8% FBS, while in all other cases media lacking cyst(e)ine and supplemented with 10% dialysed FBS (dFBS) has been used and the CySSCy/CySH/MeAIB adjusted thereafter.

**Figure S5: The involvement of cysteine transporters in cysteine-cystine shuttle. A.** Proliferation rate of A549 wt, ASCT1<sup>KO</sup>, ASCT2<sup>KO</sup>, ASCT1-ASCT2<sup>DKO</sup> and LAT1<sup>KO</sup> cells for 3 days; presented as fold of change (mean  $\pm$  SEM; n = 2). **B.** Cell death of MiaPaCa-2 wt, xCT<sup>KO</sup> and xCT-ASCT2<sup>DKO</sup> in control conditions, in the presence of NAC or cultivated in the presence of A549 wt (left panel) or ASCT1-ASCT2<sup>DKO</sup> (right panel) cells (Boyden chamber). The bar graph represent mean  $\pm$  SEM; n=2; \*, P<0.05, comparison with WT control of each group.

**Figure S6: Pharmacological inhibition of cysteine transporters.** Cell viability of the MiaPaCa-2 wt, xCT<sup>KO</sup> or xCT-ASCT2<sup>DKO</sup> co-cultured with A549 wt cells in the presence or not of 1mM NAC, 3mM L-alanine, 3mM L-leucine or 3mM MeAIB after 48h. Bar graph shows mean  $\pm$  SEM; n=3; \*, P<0.05, comparison with WT control of each group.

S1A

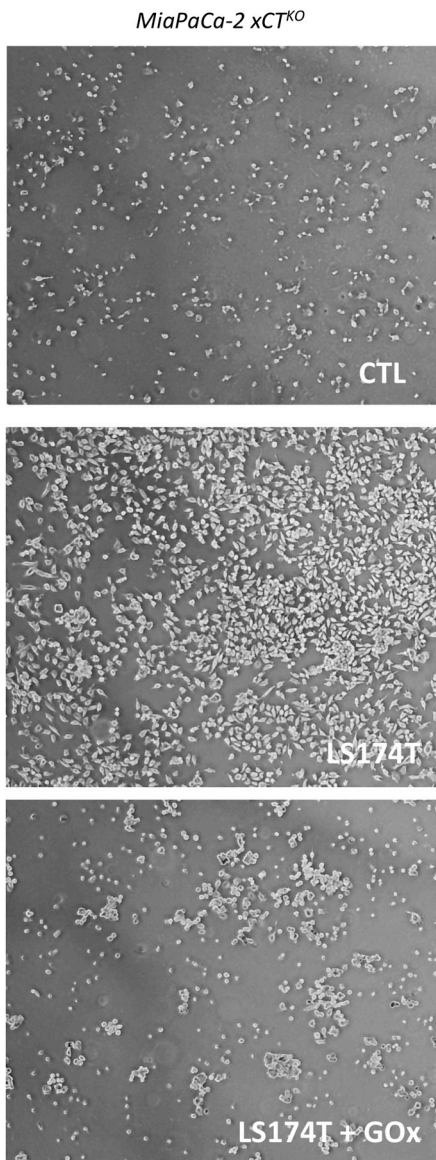

S1B

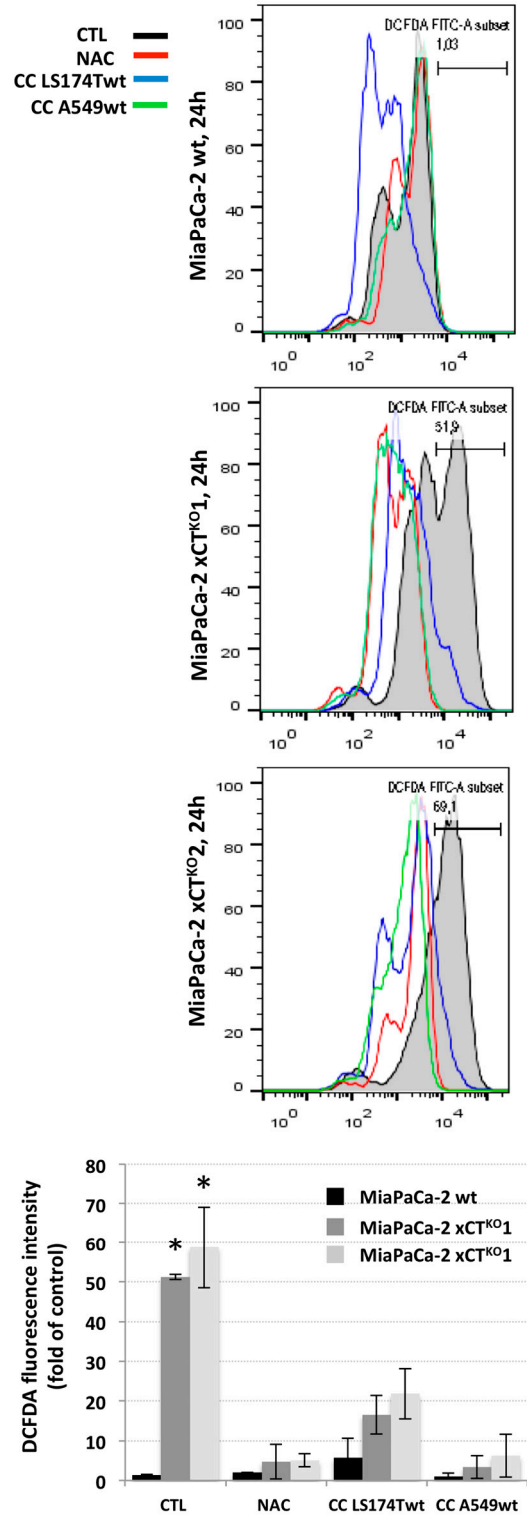

Figure S1

## S2A

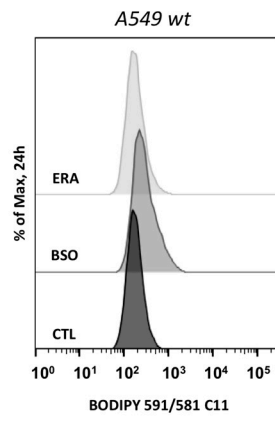

## S2B

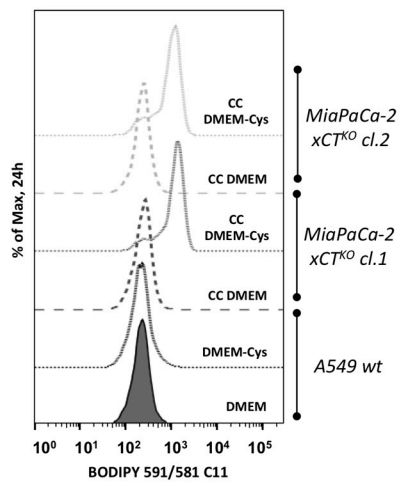

Figure S2

**S3A**

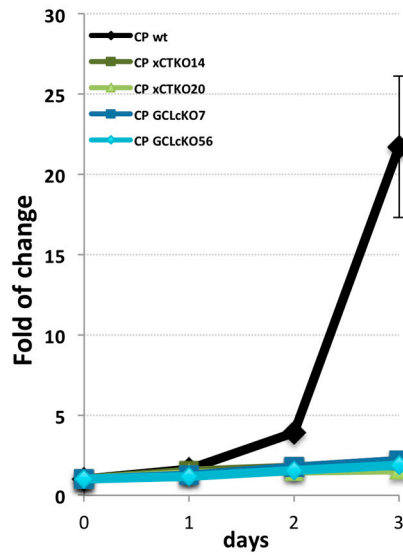

**S3B**

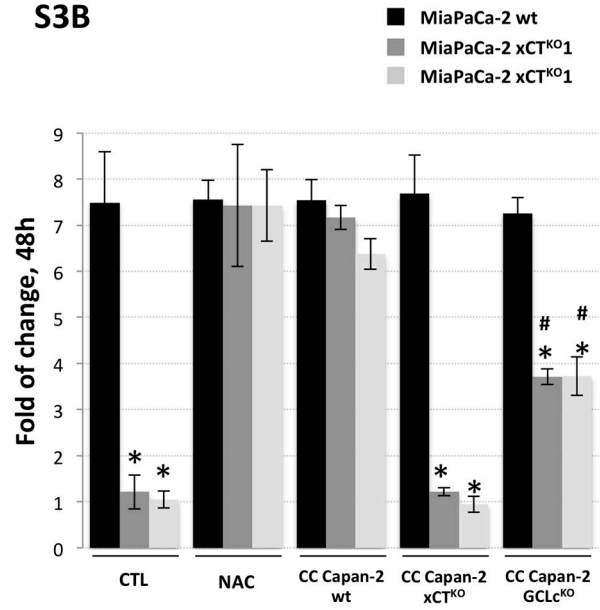

**S3C**

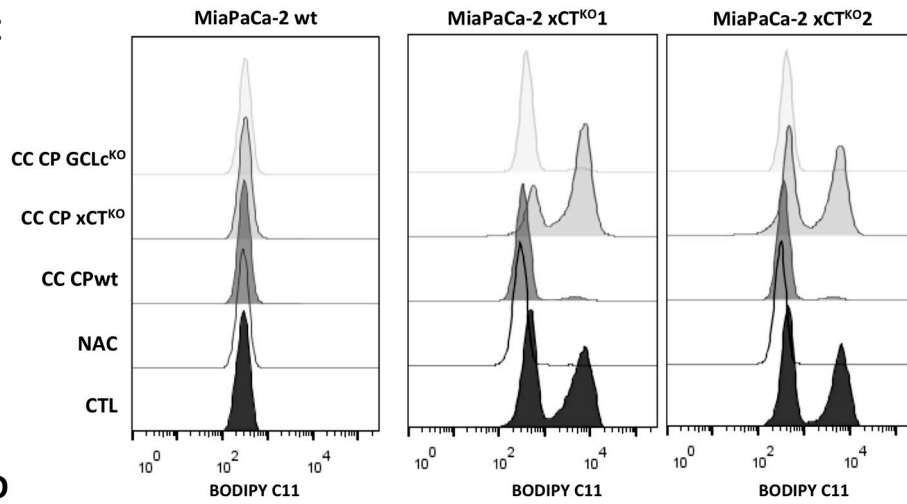

**S3D**

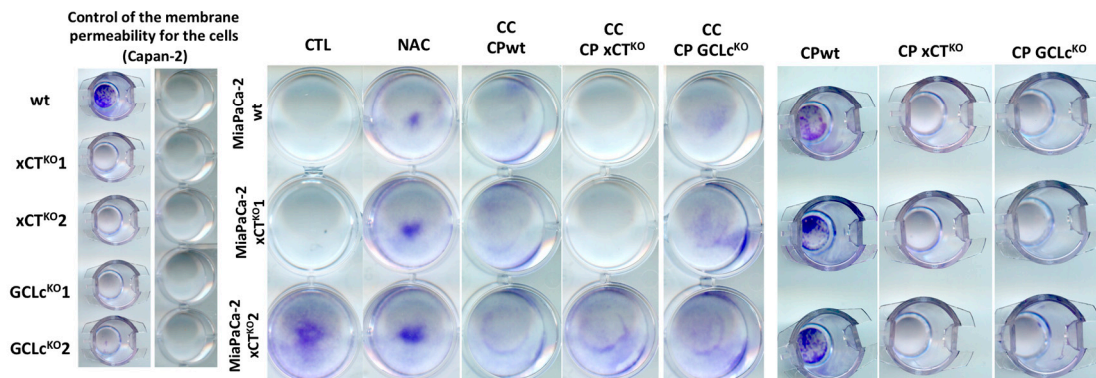

Figure S3

### S4A

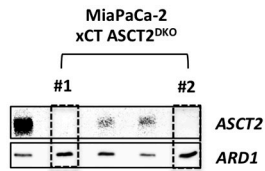

### S4B

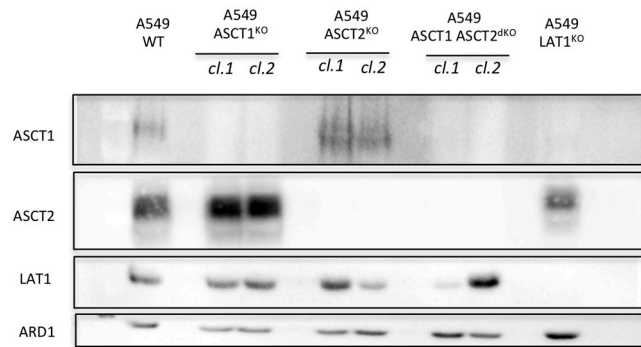

### S4C

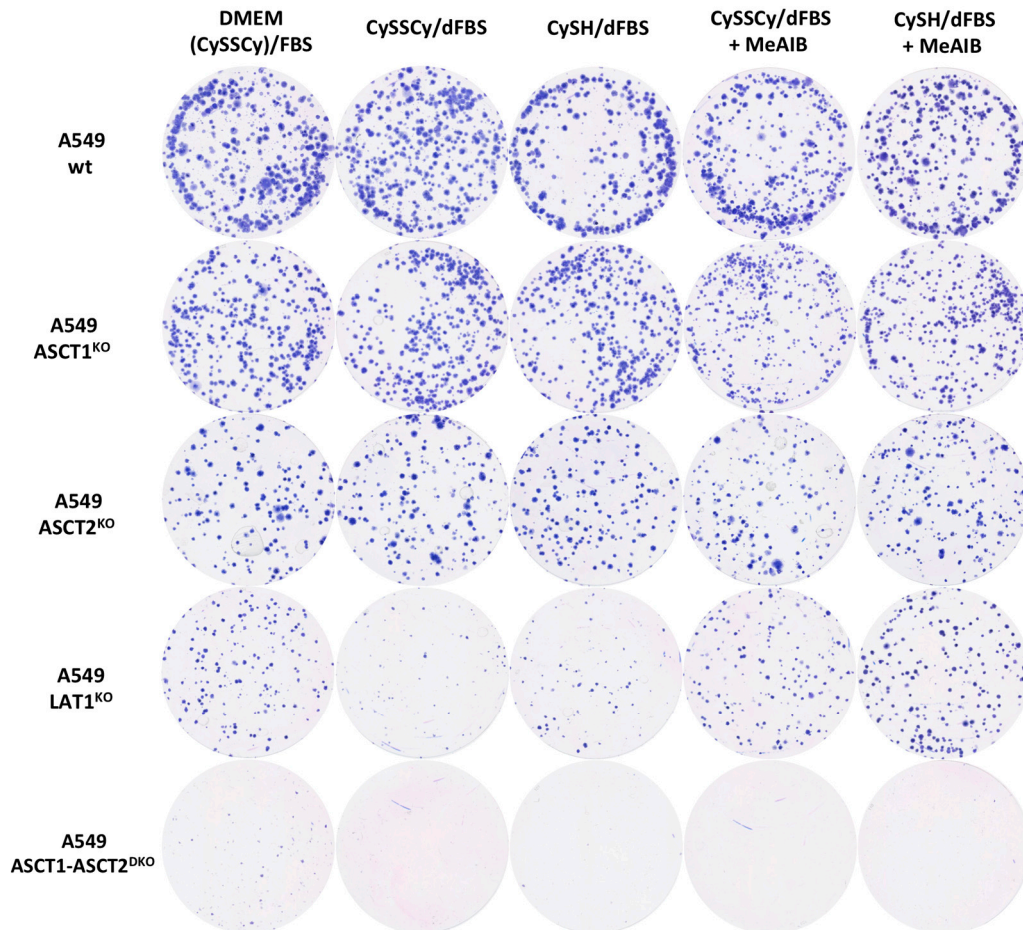

Figure S4

S6

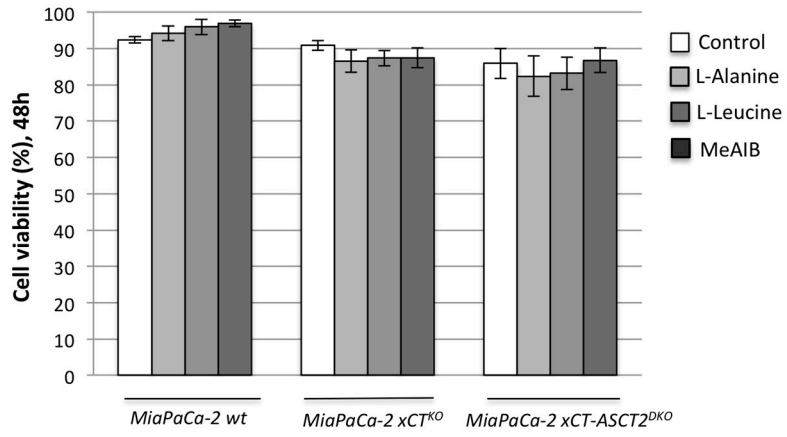

Figure S5

Figure S6  
Additional supplementary data

**Add Supp for Fig 1B** Example of the FSC/SSC plots for the co-culture after 24h – « guest » and « host » cells are undistinguishable

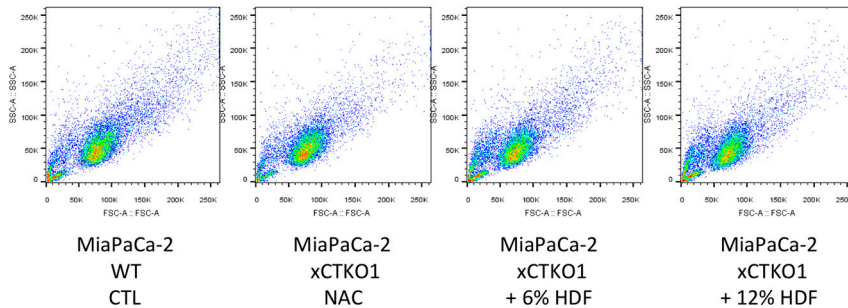

**Add Supp for Fig 3C** Accumulation of lipid hydroperoxides MiaPaCa-2 xCT<sup>KO</sup> cells (two independent clones) in co-culture (CC) or cultivated in the presence of conditional media (CM) of Capan-2 GCLc<sup>KO</sup> or xCT<sup>KO</sup> cells (**two independent clones for each cell line**) during 24h. Representative histogram of three independent experiments are shown

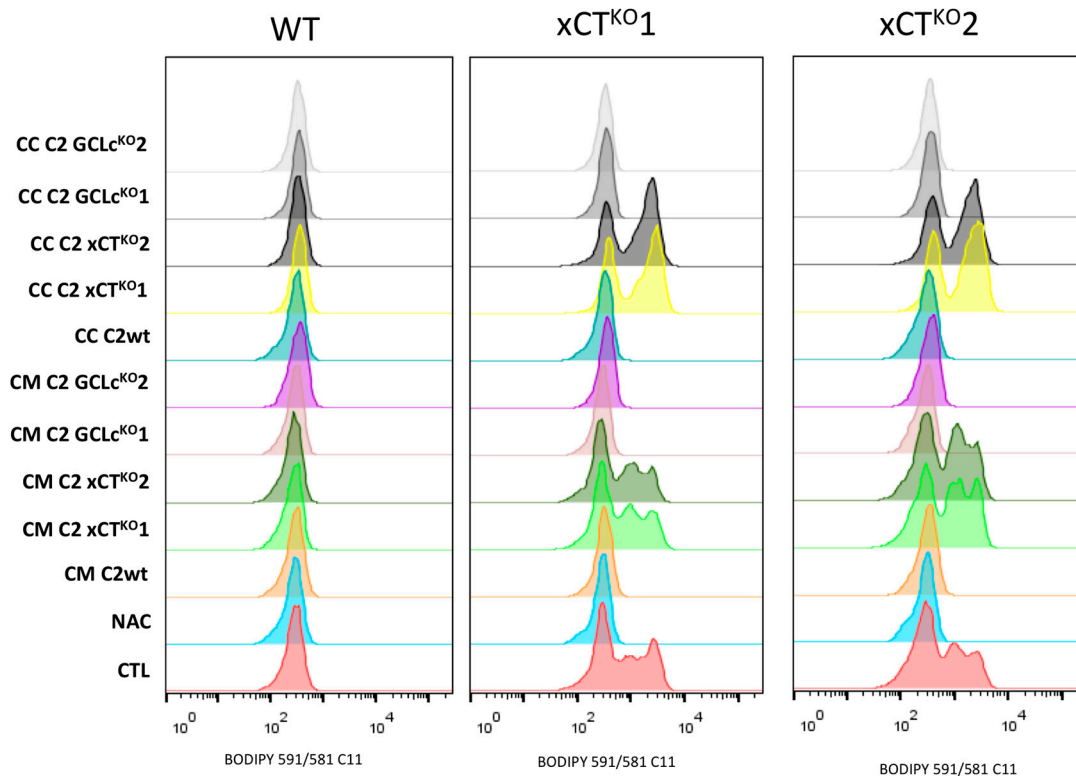



**Add Supp for Fig 4B** Lipid hydroperoxide accumulation of MiaPaCa-2 xCT<sup>KO</sup> and xCT-ASCT2<sup>DKO</sup> cells (guest cells- CySH import) in control conditions or co-cultured with 6% A549 wt, ASCT1<sup>KO</sup>, ASCT2<sup>KO</sup> or ASCT1-ASCT2<sup>DKO</sup> (host cells- CySH export). Representative histogram (n=3) of additional, independent clone for each KO/DKO-cell line.

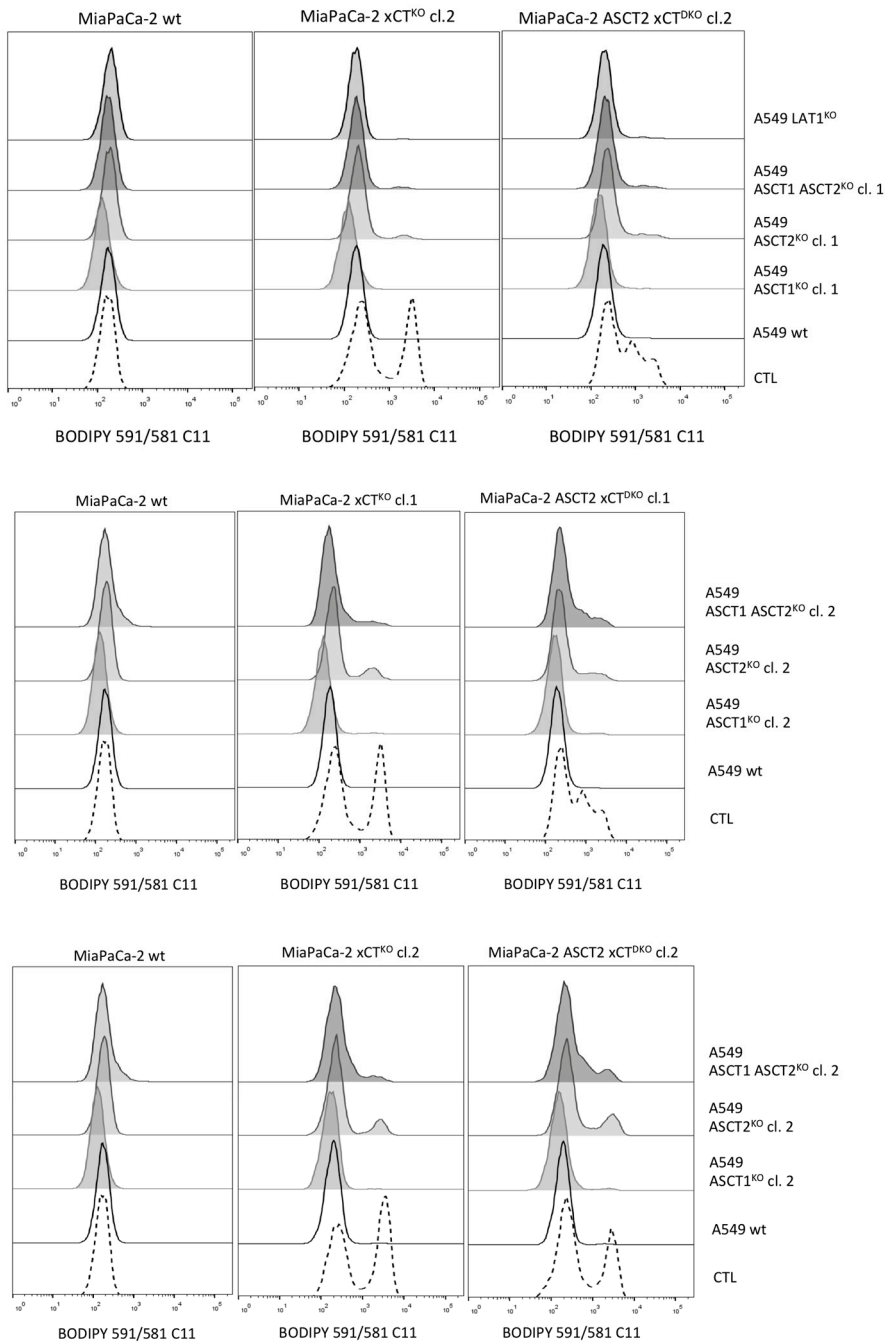

**Add Supp for Fig 4B** Cell viability of MiaPaCa-2 xCT<sup>KO</sup> and xCT-ASCT2<sup>DKO</sup> cells (guest cells- CySH import) in control conditions or co-cultured with 6% A549 wt, ASCT1<sup>KO</sup>, ASCT2<sup>KO</sup> or ASCT1-ASCT2<sup>DKO</sup> (host cells- CySH export). Bar graph shows mean  $\pm$  SEM; n=3; \*, P<0.05, comparison with the corresponding control group. Data for two independent clones for each KO/DKO-cell line.

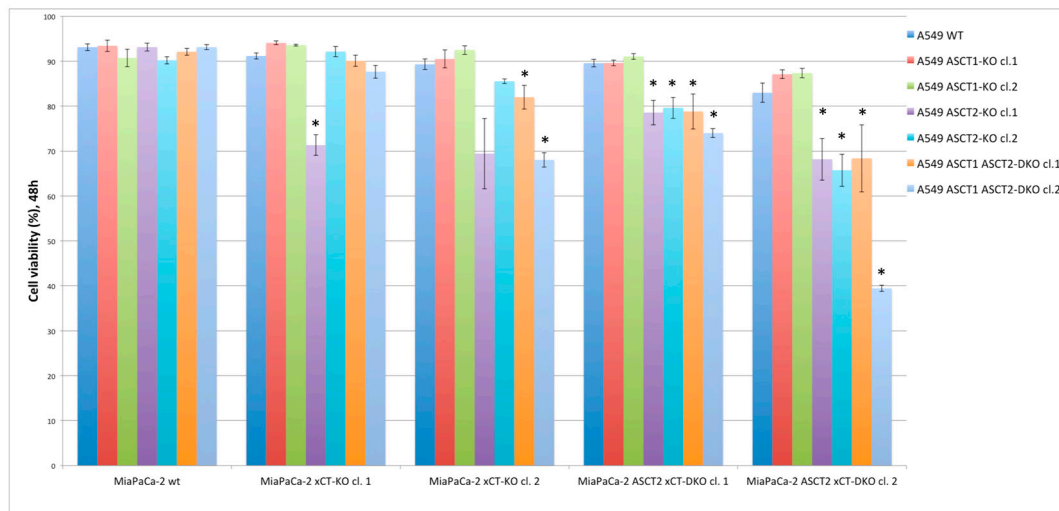

**Add Supp for Fig 5B** Accumulation of the lipid hydroperoxides in MiaPaCa-2 wt, xCT<sup>KO</sup> or xCT-ASCT2<sup>DKO</sup> (guest cells) co-cultured with A549 wt cells (host cells) in the presence or not of the 1mM NAC, 3mM L-alanine, 3mM L-leucine or 3mM MeAIB after 24h. Representative histogram (n=3) of additional, independent clone for each KO/DKO-cell line.

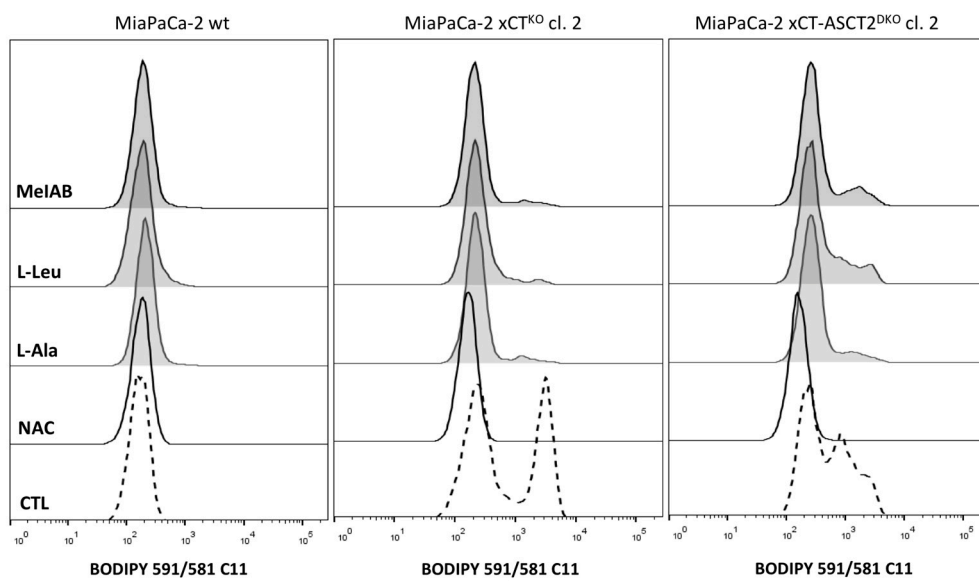

**Add Supp for Fig S4** Cell viability of the MiaPaCa-2 wt, xCT<sup>KO</sup> or xCT-ASCT2<sup>DKO</sup> co-cultured with A549 wt cells in the presence or not of 1mM NAC, 3mM L-alanine, 3mM L-leucine or 3mM MeAIB after 48h. Bar graph shows mean  $\pm$  SEM; n=3; \*, P<0.05, comparison with WT control of each group. Data for additional, independent clone for each KO/DKO-cell line.

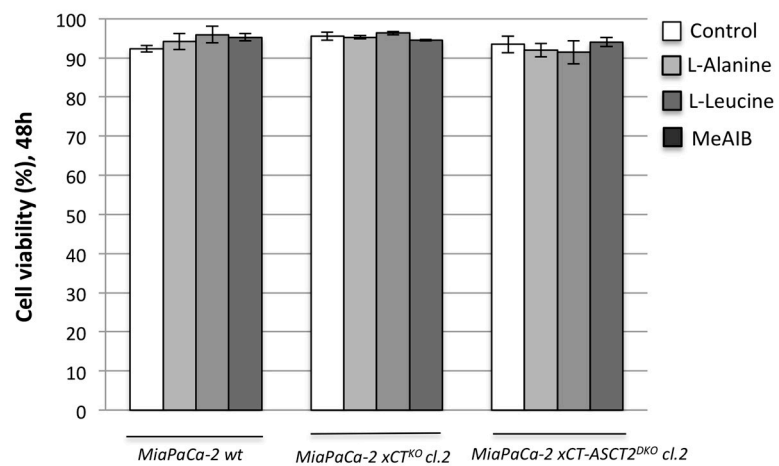

Add Supp for Fig 1A, 2D Original WB membranes

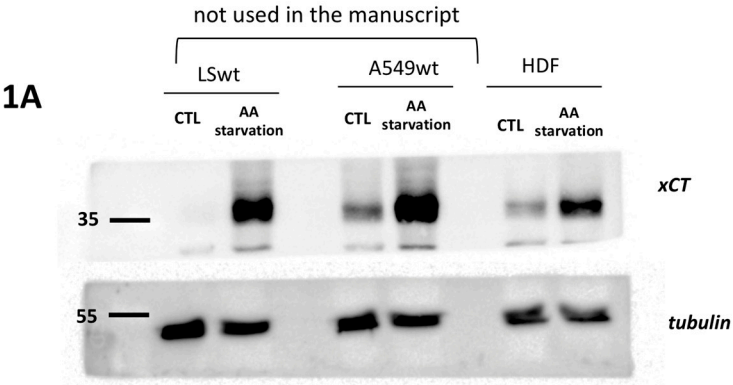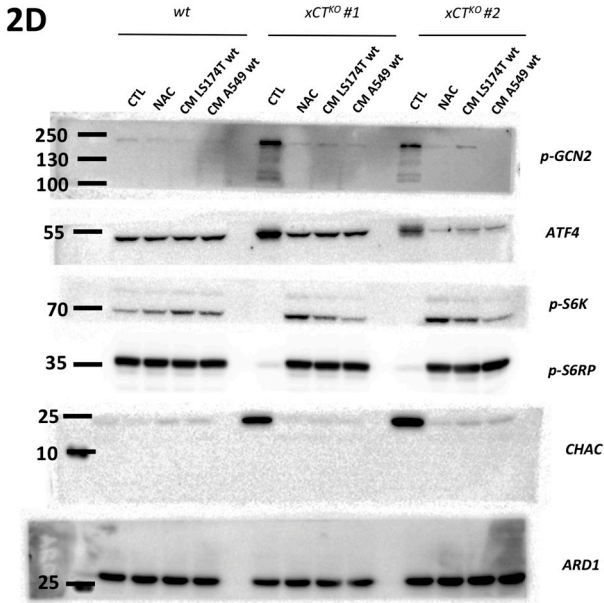

## Add Supp for Fig 4A Original WB membranes

4A

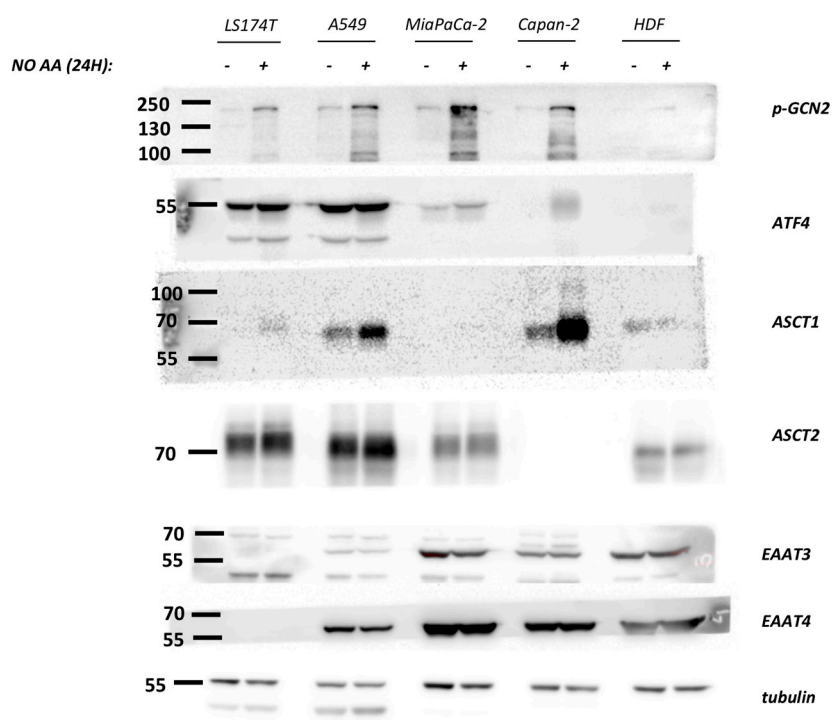

## Add Supp for Fig S3A, S3B Original WB membranes

### Supp3A

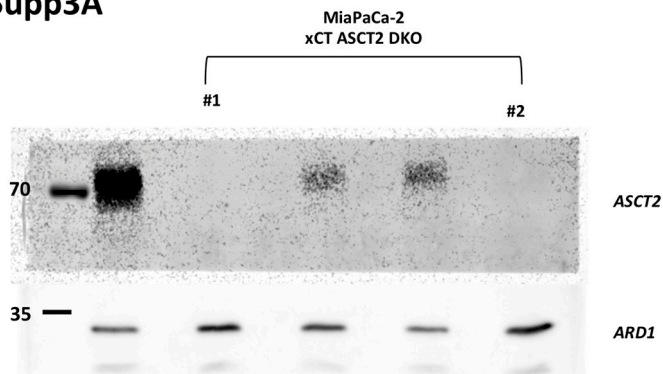

### Supp3B

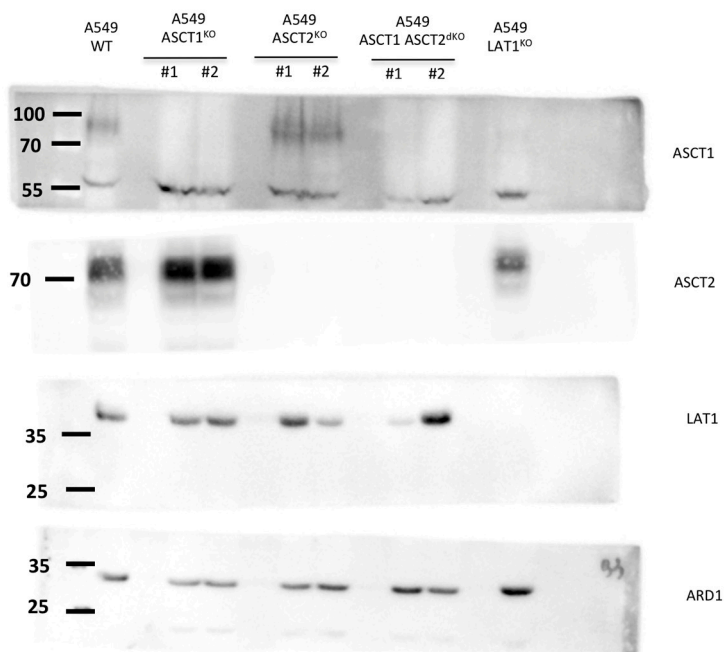

## Add Supp for Fig 1A, 2D, 4A, S3A, S3B Densitometry readings for WB blots

| Fig. 1A  |           |               |
|----------|-----------|---------------|
|          | CTL       | AA starvation |
| xCT      | 7137.116  | 19047.350     |
| tubuline | 19430.208 | 18175.865     |

|          | Fig. 2D   |           |              |            |           |           |              |            |           |           |              |            |
|----------|-----------|-----------|--------------|------------|-----------|-----------|--------------|------------|-----------|-----------|--------------|------------|
|          | wt        |           |              |            | xCTKO #1  |           |              |            | xCTKO #2  |           |              |            |
|          | CTL       | NAC       | CM LS174T wt | CM A549 wt | CTL       | NAC       | CM LS174T wt | CM A549 wt | CTL       | NAC       | CM LS174T wt | CM A549 wt |
| p-GCN2   | 751.820   | 572.749   | 426.335      | 269.335    | 5883.045  | 603.406   | 543.698      | 297.506    | 4440.296  | 331.920   | 591.042      | 0          |
| ATF4     | 6981.539  | 6826.660  | 6729.146     | 8109.924   | 15347.794 | 7852.045  | 8522.803     | 7641.146   | 12167.279 | 2319.104  | 3711.903     | 3201.832   |
| p-S6K    | 2342.083  | 4000.225  | 5264.933     | 3964.861   | 128.021   | 7044.347  | 5179.225     | 2325.548   | 267.263   | 7995.296  | 5777.690     | 2850.982   |
| p-SERP   | 14075.833 | 14924.359 | 14420.187    | 14256.702  | 1964.912  | 14976.480 | 14802.187    | 14202.652  | 1326.012  | 12528.823 | 15354.844    | 17168.673  |
| CHAC     | 1113.184  | 1028.648  | 1260.305     | 1546.912   | 12688.803 | 2026.497  | 1722.962     | 1321.184   | 16192.116 | 2363.397  | 1880.033     | 1337.376   |
| tubuline | 8321.196  | 9808.217  | 9858.095     | 9068.267   | 7739.317  | 8347.317  | 7898.853     | 7258.903   | 9389.803  | 8793.489  | 8268.075     | 5961.054   |

| No AA (24h) | Fig. 4A   |           |           |           |           |           |           |           |          |          |  |  |     |  |
|-------------|-----------|-----------|-----------|-----------|-----------|-----------|-----------|-----------|----------|----------|--|--|-----|--|
|             | LS174T    |           |           | A549      |           |           | MiaPaCa-2 |           |          | Capan-2  |  |  | HDF |  |
| p-GCN2      | 462.335   | 1732.376  | 1313.134  | 2907.983  | 3053.468  | 7354.823  | 1005.062  | 2601.790  | 0        | 260.799  |  |  |     |  |
| ATF4        | 10107.288 | 12070.844 | 13426.016 | 13442.551 | 1390.033  | 1813.861  | 0         | 3950.033  | 0        | 247.192  |  |  |     |  |
| ASCT1       | 323.799   | 362.920   | 11461.309 | 14665.602 | 0         | 0         | 17804.693 | 27347.836 | 3287.276 | 2268.376 |  |  |     |  |
| ASCT2       | 11999.572 | 13561.421 | 15493.078 | 18526.635 | 9102.823  | 8967.995  | 0         | 0         | 3529.510 | 4279.874 |  |  |     |  |
| FAA13       | 223.021   | 153.778   | 1208.062  | 1033.234  | 8786.468  | 8735.175  | 3848.983  | 3992.640  | 7012.004 | 7417.368 |  |  |     |  |
| FAA14       | 0         | 0         | 6194.660  | 5649.418  | 12520.146 | 13011.803 | 9925.560  | 8980.075  | 5782.660 | 7813.953 |  |  |     |  |
| tubuline    | 4533.376  | 4253.790  | 3359.790  | 3142.376  | 7274.518  | 5887.690  | 5030.104  | 4270.154  | 5239.276 | 5164.569 |  |  |     |  |

| Supplementary 3A        |           |          |          |          |           |
|-------------------------|-----------|----------|----------|----------|-----------|
| MiaPaCa-2 xCT ASC12 DKO |           |          |          |          |           |
|                         | #1        |          | #2       |          |           |
| ASCT2                   | 34884.685 | 0        | 5720.359 | 6686.409 | 0         |
| ARD1                    | 5967.640  | 8798.125 | 6970.761 | 4414.276 | 10329.903 |

| Supplementary Fig. 3B |           |                 |                 |                 |                 |                      |                      |            |
|-----------------------|-----------|-----------------|-----------------|-----------------|-----------------|----------------------|----------------------|------------|
|                       | A549 WT   | A549 ASC1TKO #1 | A549 ASC1TKO #2 | A549 ASC1TKO #1 | A549 ASC1TKO #2 | A549 ASC1-ASC1TKO #1 | A549 ASC1-ASC1TKO #2 | A549 LATKO |
| ASCT1                 | 7596.572  | 11640.350       | 11908.693       | 0               | 0               | 0                    | 0                    | 494.678    |
| ASCT2                 | 11372.773 | 19162.836       | 17526.208       | 0               | 0               | 0                    | 0                    | 7060.752   |
| LAT1                  | 6412.560  | 5812.782        | 7520.095        | 8592.267        | 3204.296        | 1137.891             | 12201.752            | 0          |
| ARD1                  | 3930.276  | 2717.619        | 3347.861        | 3507.154        | 4983.104        | 6155.761             | 4155.861             | 8386.539   |
